# Supplementary material
Source: PubMed Central journal article supplement (PMC6382603)

Figure S1: Median panel reactive antibody change by number of HLA mismatches, pre-2005 and post-2005

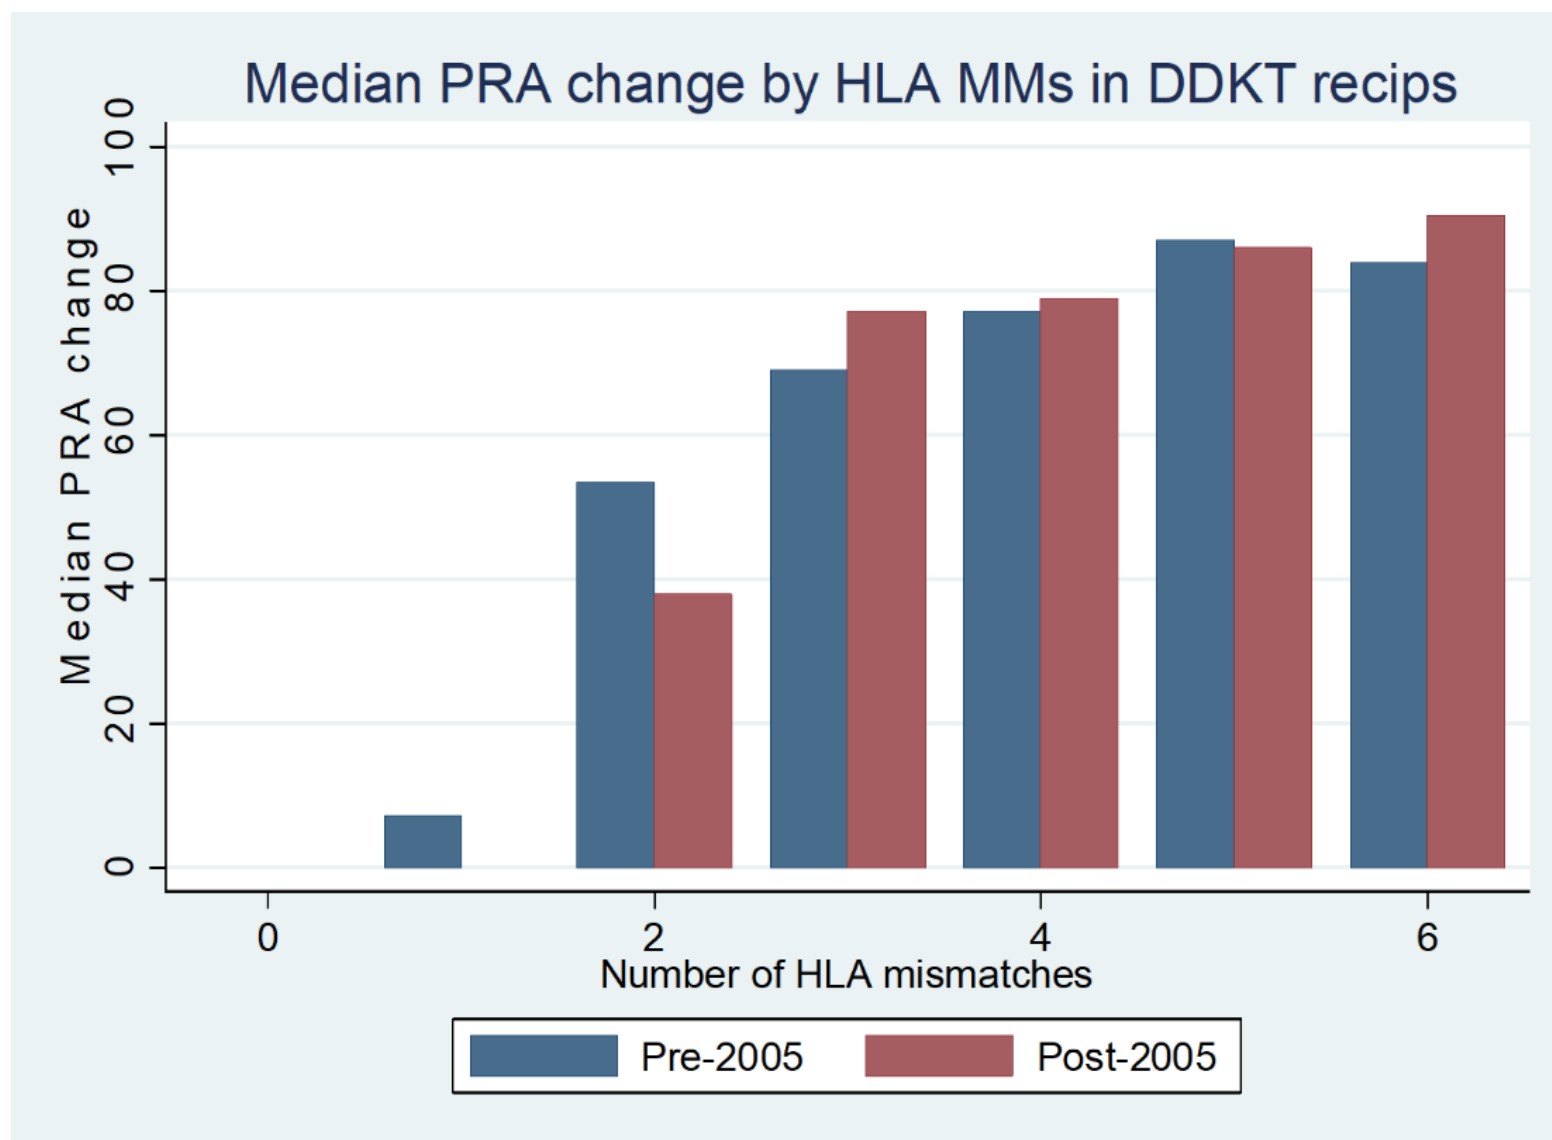

Figure S2: Time to retransplantation by era

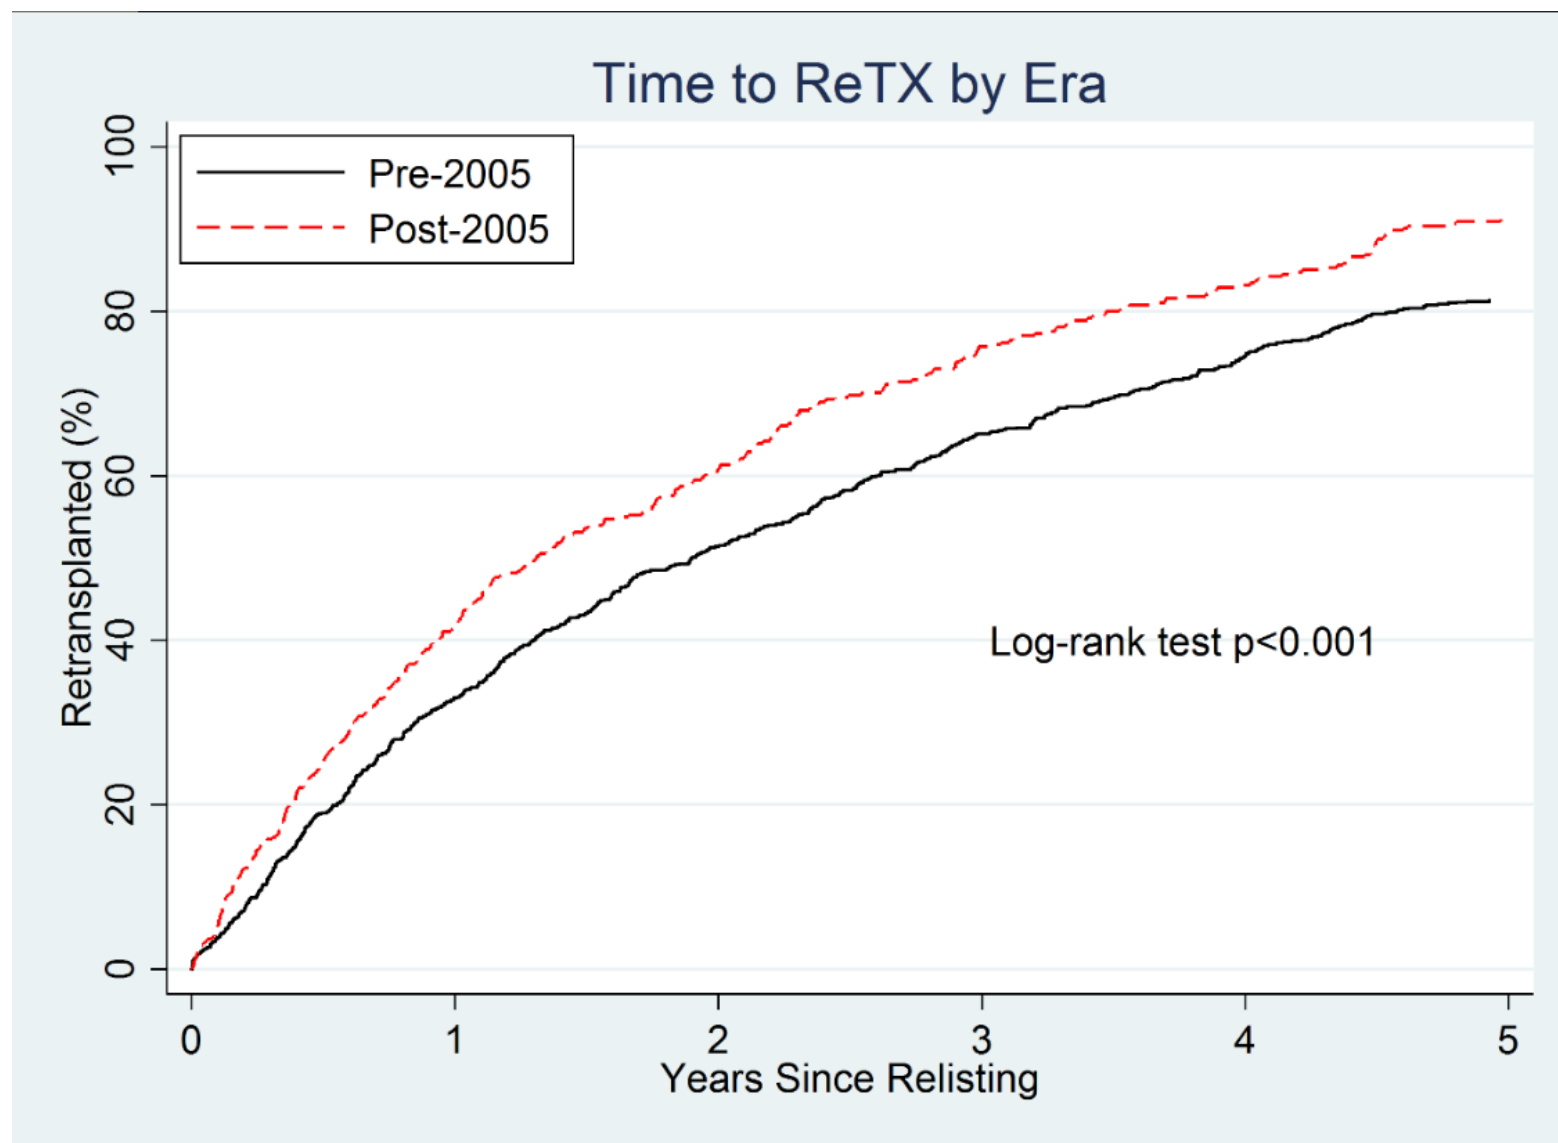

Supplement: NIHMS1504026-supplement-Supplemental_Digital_Content_to_Be_Published__cited_in_text_.pdf [file NIHMS1504026-supplement-Supplemental_Digital_Content_to_Be_Published__cited_in_text_.pdf]
